# Supplementary material for: Structural insights into the assembly of gp130 family cytokine signaling complexes
Source: PubMed Central journal article supplement (PMC10022904; doi:10.1126/sciadv.ade4395), 2023-03-17
Supplement: sciadv.ade4395_sm.pdf [file sciadv.ade4395_sm.pdf]

Supplementary Materials for  
**Structural insights into the assembly of gp130 family cytokine  
signaling complexes**

Yi Zhou *et al.*

Corresponding author: Yi Zhou, [yi.zhou@regeneron.com](mailto:yi.zhou@regeneron.com); Matthew C. Franklin, [matthew.franklin@regeneron.com](mailto:matthew.franklin@regeneron.com)

*Sci. Adv.* **9**, eade4395 (2023)  
DOI: 10.1126/sciadv.ade4395

**This PDF file includes:**

Figs. S1 to S10  
Tables S1 and S2

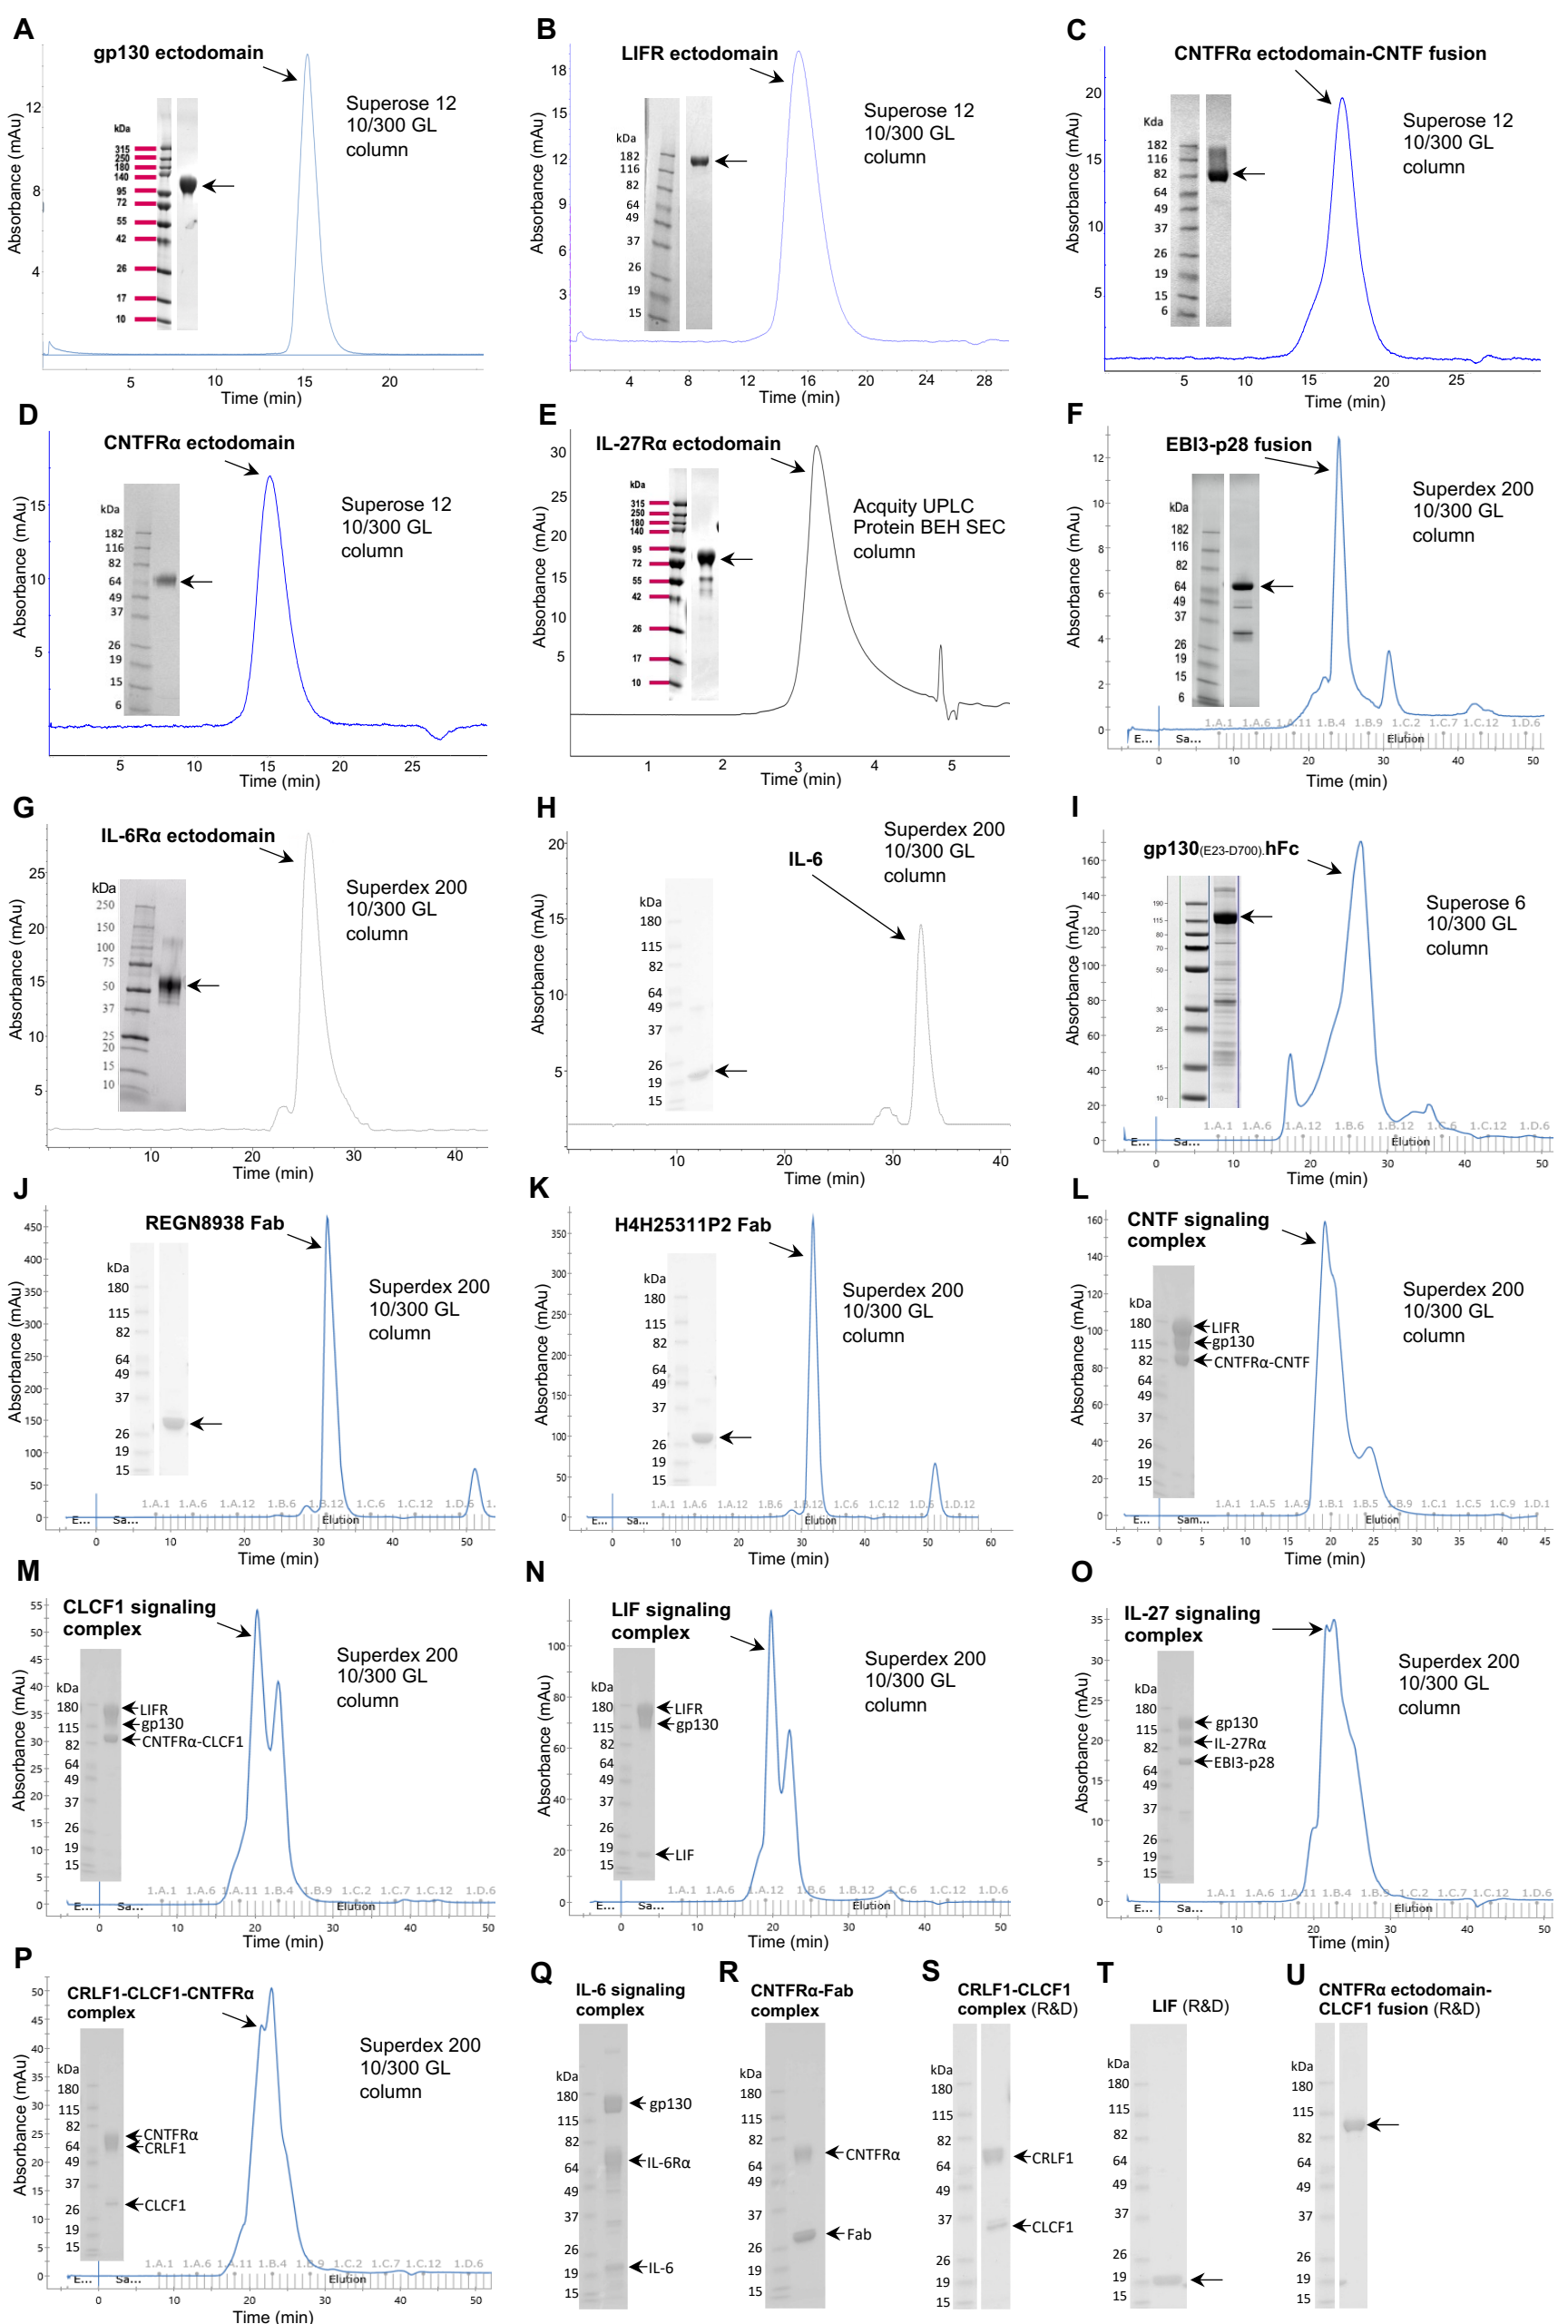

**Fig. S1. Size-exclusion chromatography (SEC) and SDS-PAGE (reducing) analysis of proteins and proteins complexes used in this study**

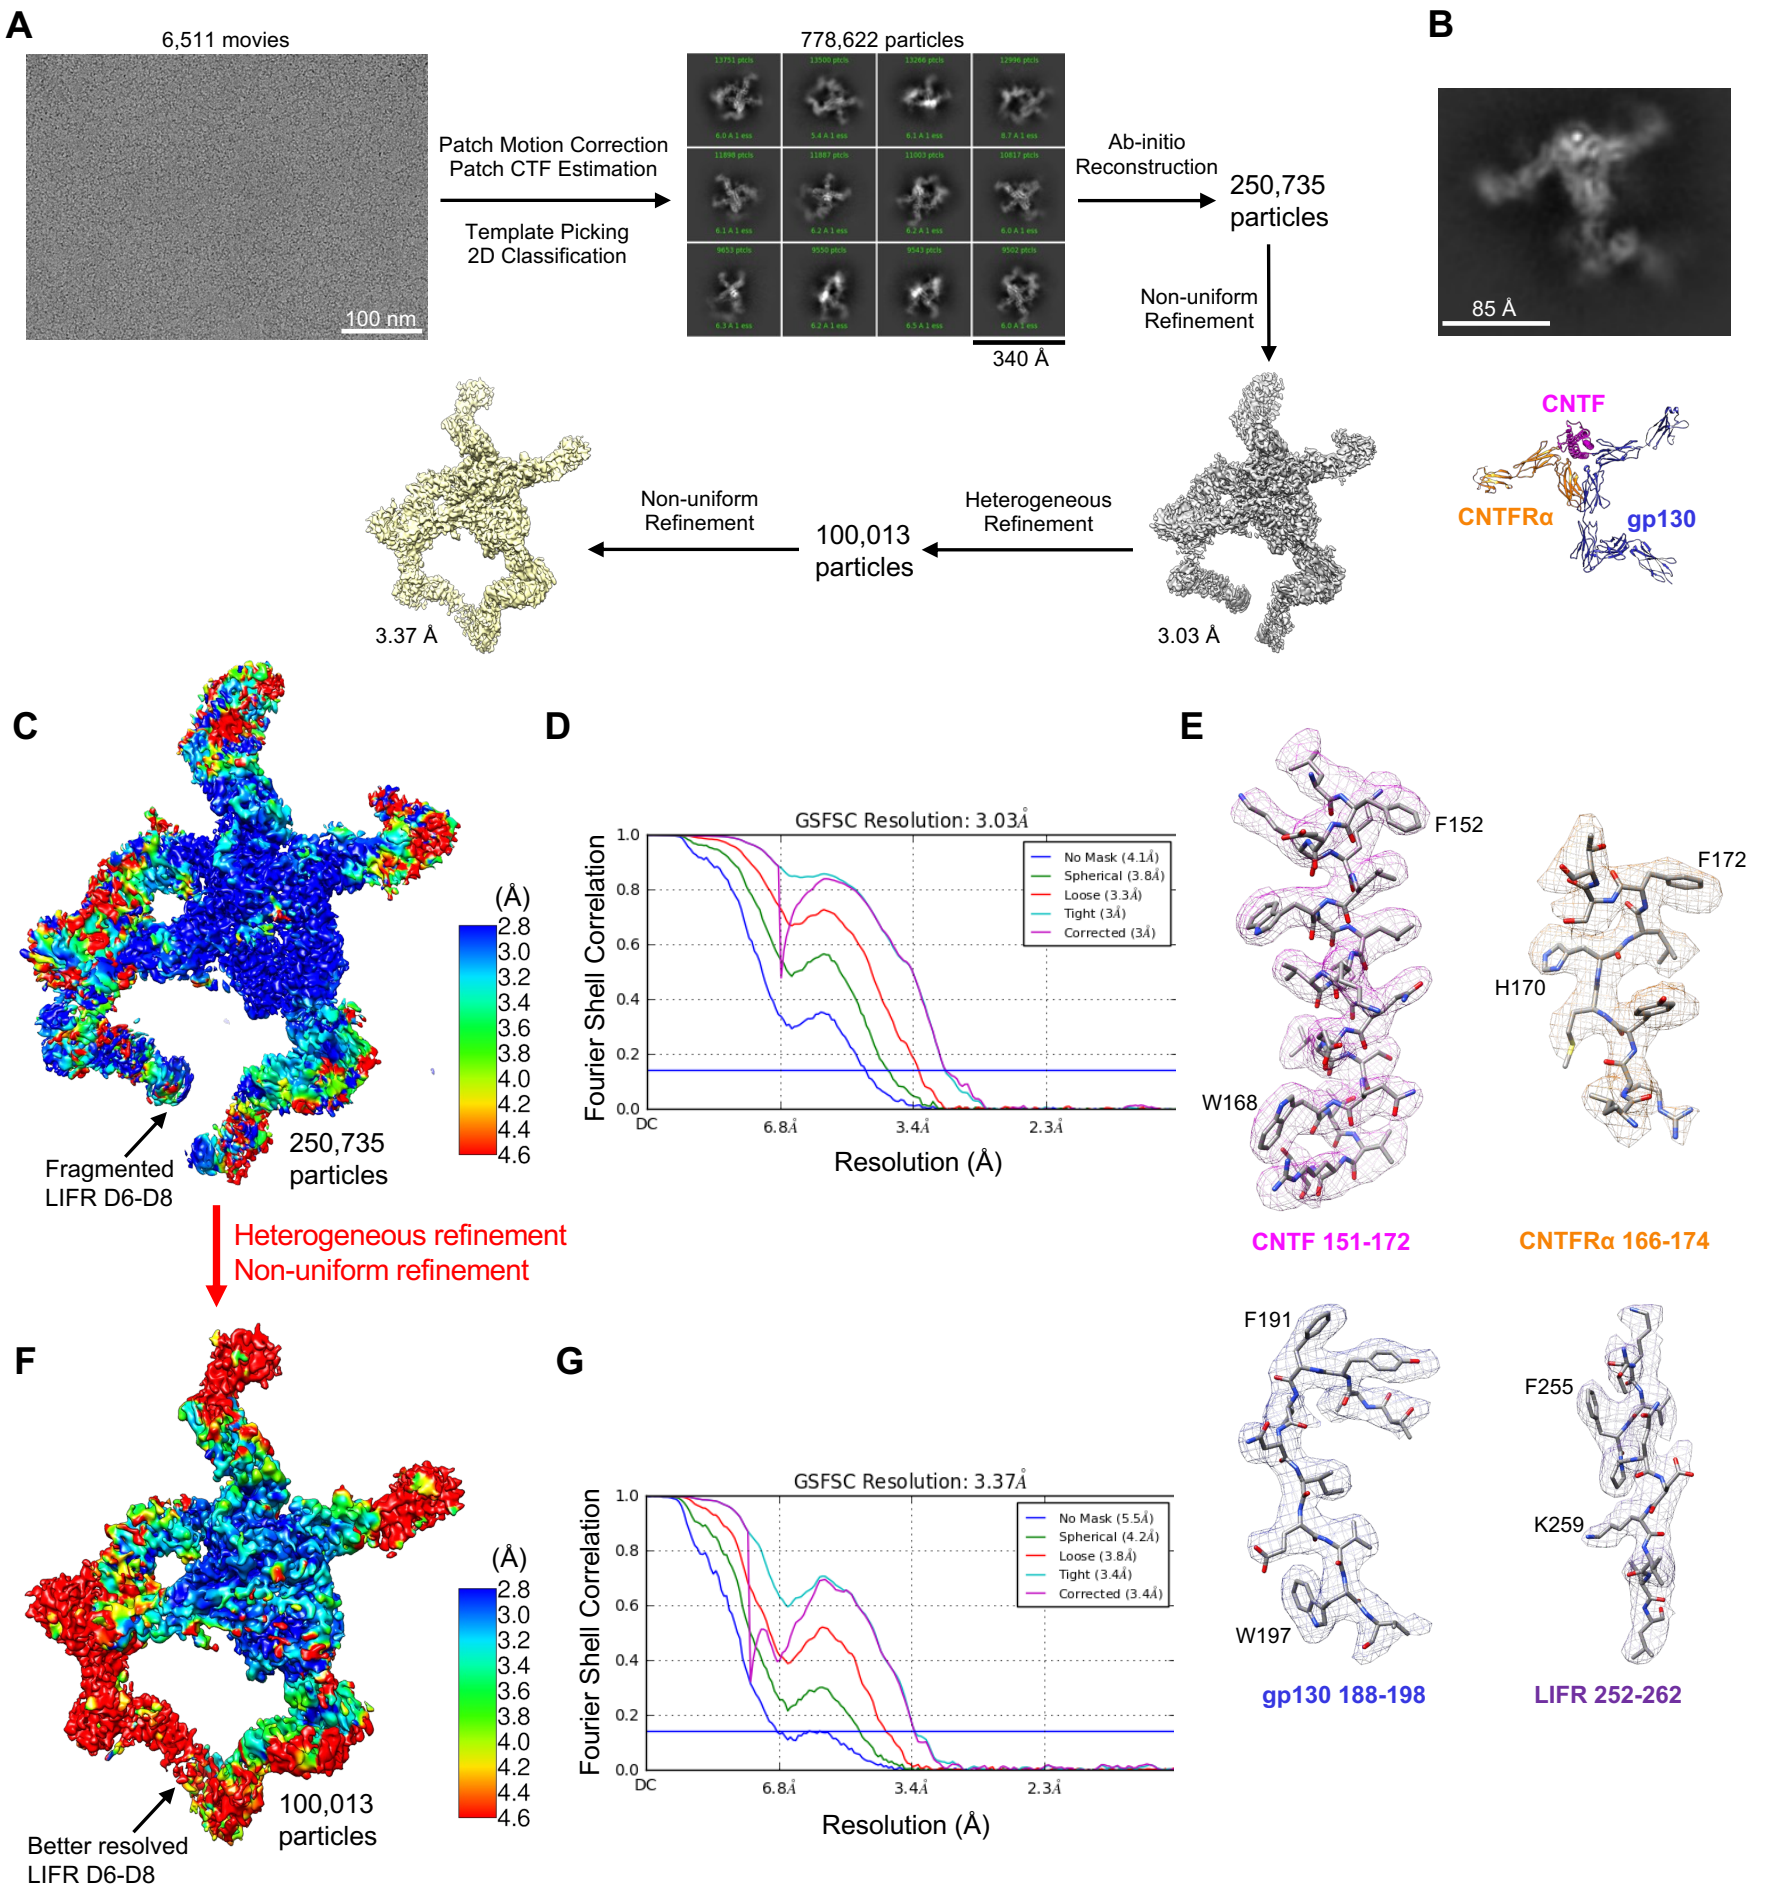

**Fig. S2. Cryo-EM analysis of the CNTF signaling complex**

(A) Workflow for cryo-EM data processing.

(B) CNTF complex intermediate (CNTF/CNTFR $\alpha$ /gp130 sub-complex) observed on the EM grid.

(C) Local resolution estimation of the final cryo-EM density map showing around 2.8 Å local resolution at the interaction core region. This map was used for building the atomic model of the interaction core region, including CNTF, CNTFR $\alpha$  D2D3, gp130 D2-D5, and LIFR D2-D5. The model was used to analyze the interaction details as shown in Figs. 2A-2D. However, the map has fragmented LIFR D6-D8 density due to flexibility-induced heterogeneity of this region.

(D) FSC curve of the CNTF complex reconstruction showing a global resolution of 3.03 Å with the 0.143 gold standard threshold.

(E) Representative cryo-EM density of the 3D reconstruction in (C).

(F) The 250,735 particles from (C) were further subjected to heterogeneous refinement, identifying 100,013 particles with more homogeneous LIFR D6-D8. Non-uniform refinement of this subset of particles yielded a map with better density at LIFR FNIII domains. The local resolution of the map was estimated, showing lower global resolution (3.37 Å). This map was used to generate a complete model of the CNTF complex with full ECDs by combining the structure of the interaction core region and models of the receptor distal domains derived from published structures (gp130 D1, PDB: 1P9M; gp130 D6, PDB: 3L5H; LIFR D1, PDB: 3E0G), a structure obtained in this study (CNTFR $\alpha$  D1, fig. S3), and a model predicted by AlphaFold (LIFR D6-D8). The map and model were used to show the overall architecture of the complex as shown in Figs. 1A-1C.

(G) FSC curve of the CNTF complex reconstruction in (F) showing a global resolution of 3.37 Å with the 0.143 gold standard threshold.



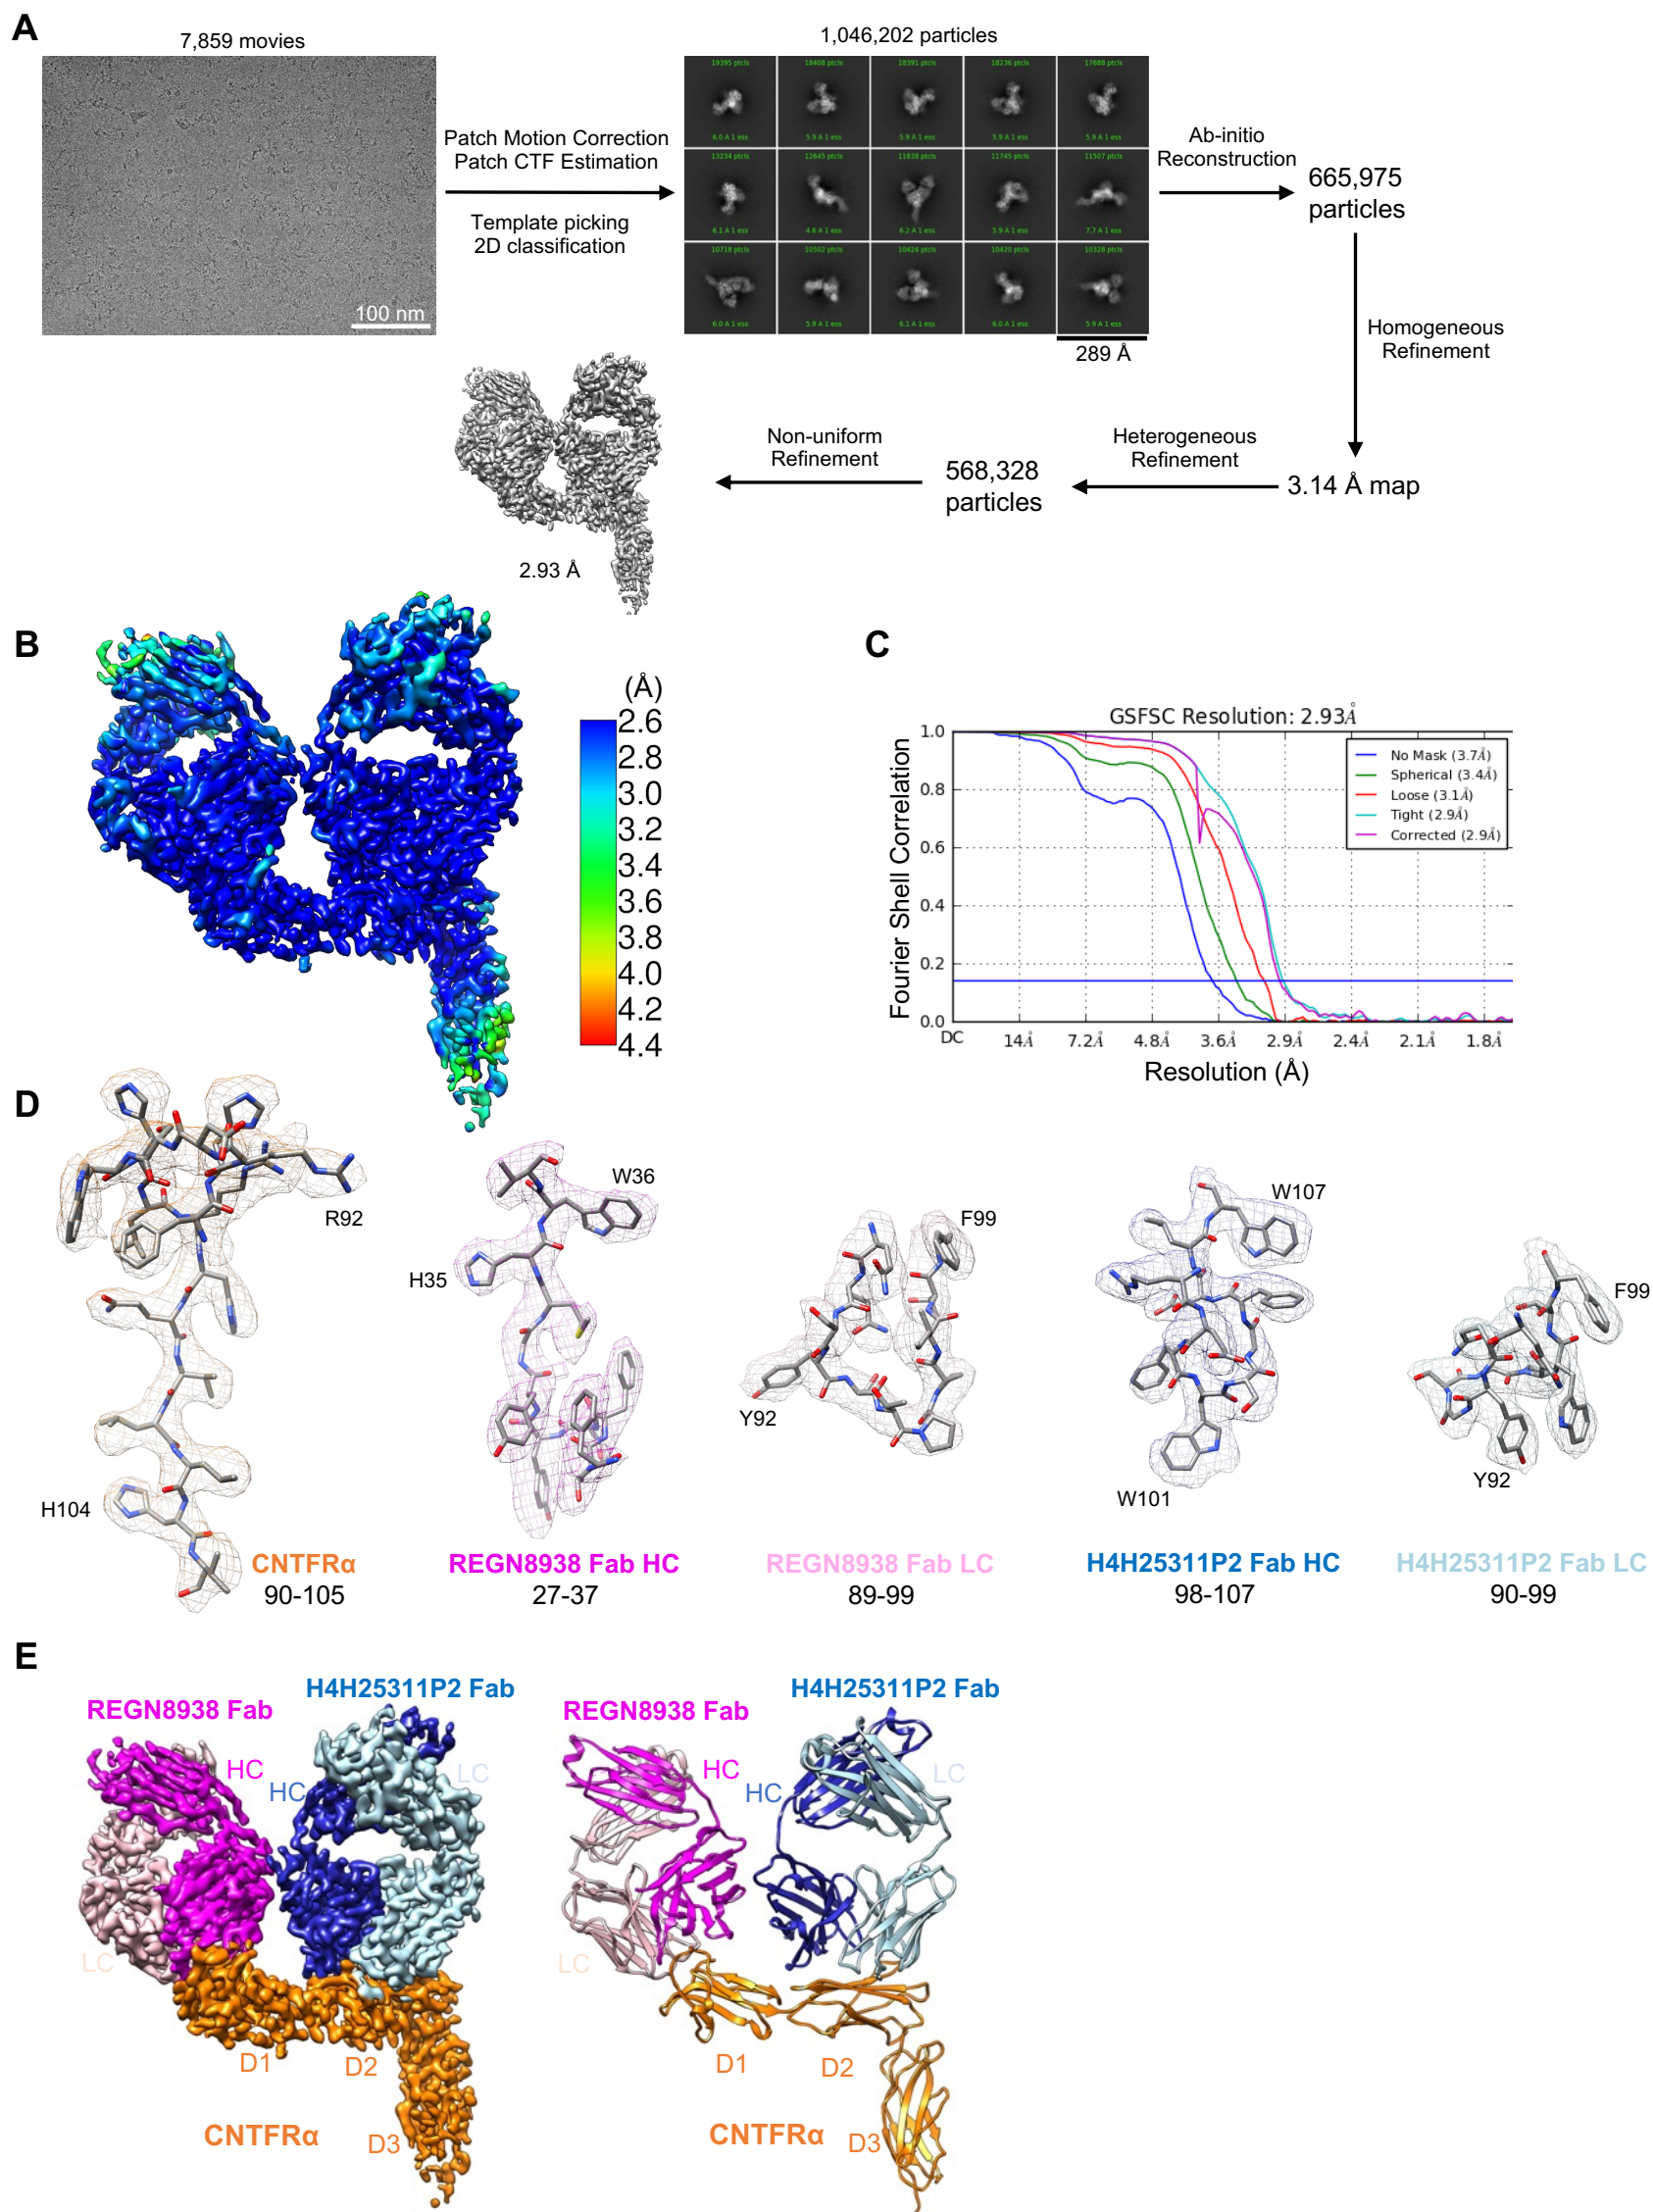

**Fig. S3. Cryo-EM structure of CNTFR $\alpha$  in complex with REGN8938 Fab and H4H25322P2 Fab**

(A) Workflow for cryo-EM data processing.

(B) Local resolution estimation of the final cryo-EM density map showing better than 3 Å resolution for the majority of CNTFR $\alpha$ .

(C) FSC curve of the CNTFR $\alpha$ /REGN8938 Fab/H4H25322P2 Fab complex reconstruction showing a global resolution of 2.93 Å with the 0.143 gold standard threshold.

(D) Representative cryo-EM density of the complex. HC: heavy chain; LC: light chain.

(E) Colored density map and atomic model of the CNTFR $\alpha$ /REGN8938 Fab/H4H25322P2 Fab complex. HC: heavy chain; LC: light chain.



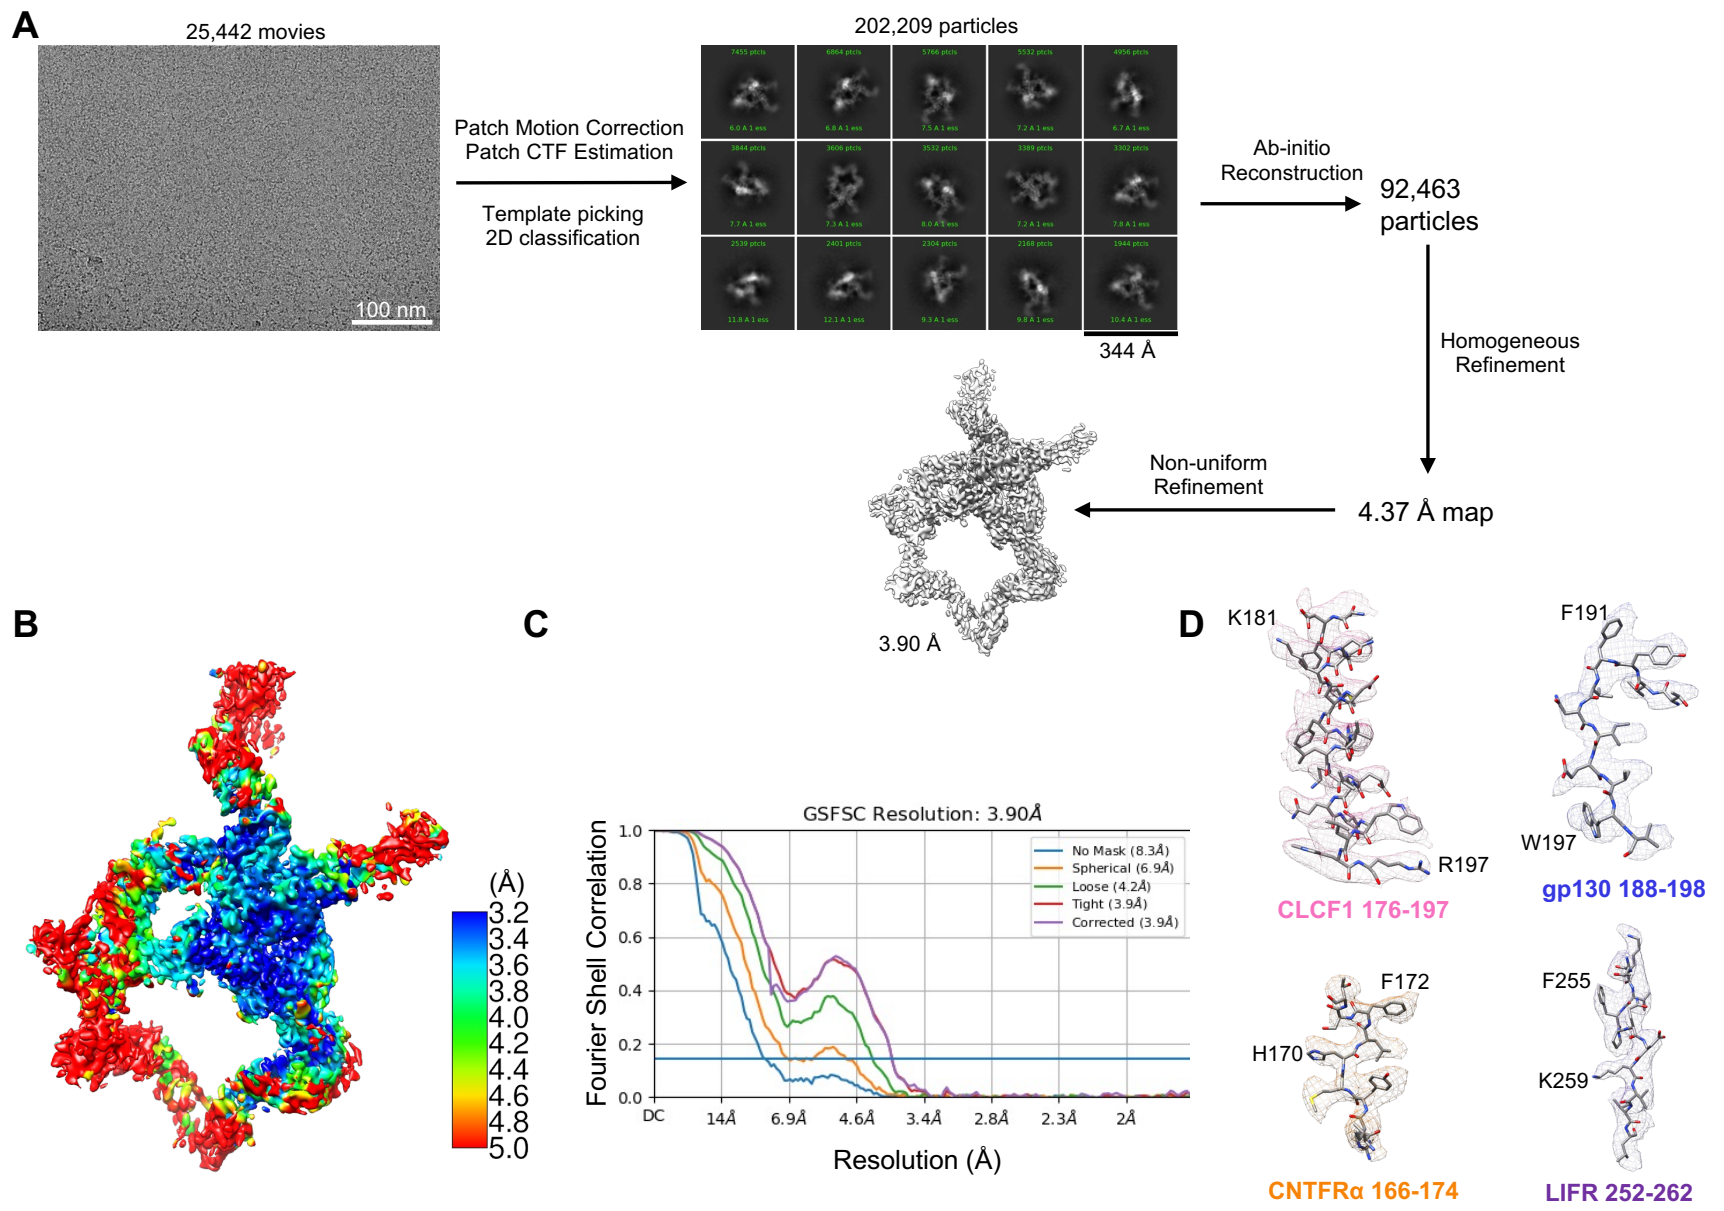

**Fig. S4. Cryo-EM analysis of the CLCF1 signaling complex**

(A) Workflow for cryo-EM data processing.

(B) Local resolution estimation of the final cryo-EM density map of the CLCF1 complex showing around 3.4 Å local resolution at the interaction core region, including CLCF1, CNTFR $\alpha$  D2D3, gp130 D2-D5, and LIFR D2-D5.

(C) FSC curve of the CLCF1 complex reconstruction showing a global resolution of 3.90 Å with the 0.143 gold standard threshold.

(D) Representative cryo-EM density of the 3D reconstruction in (B).

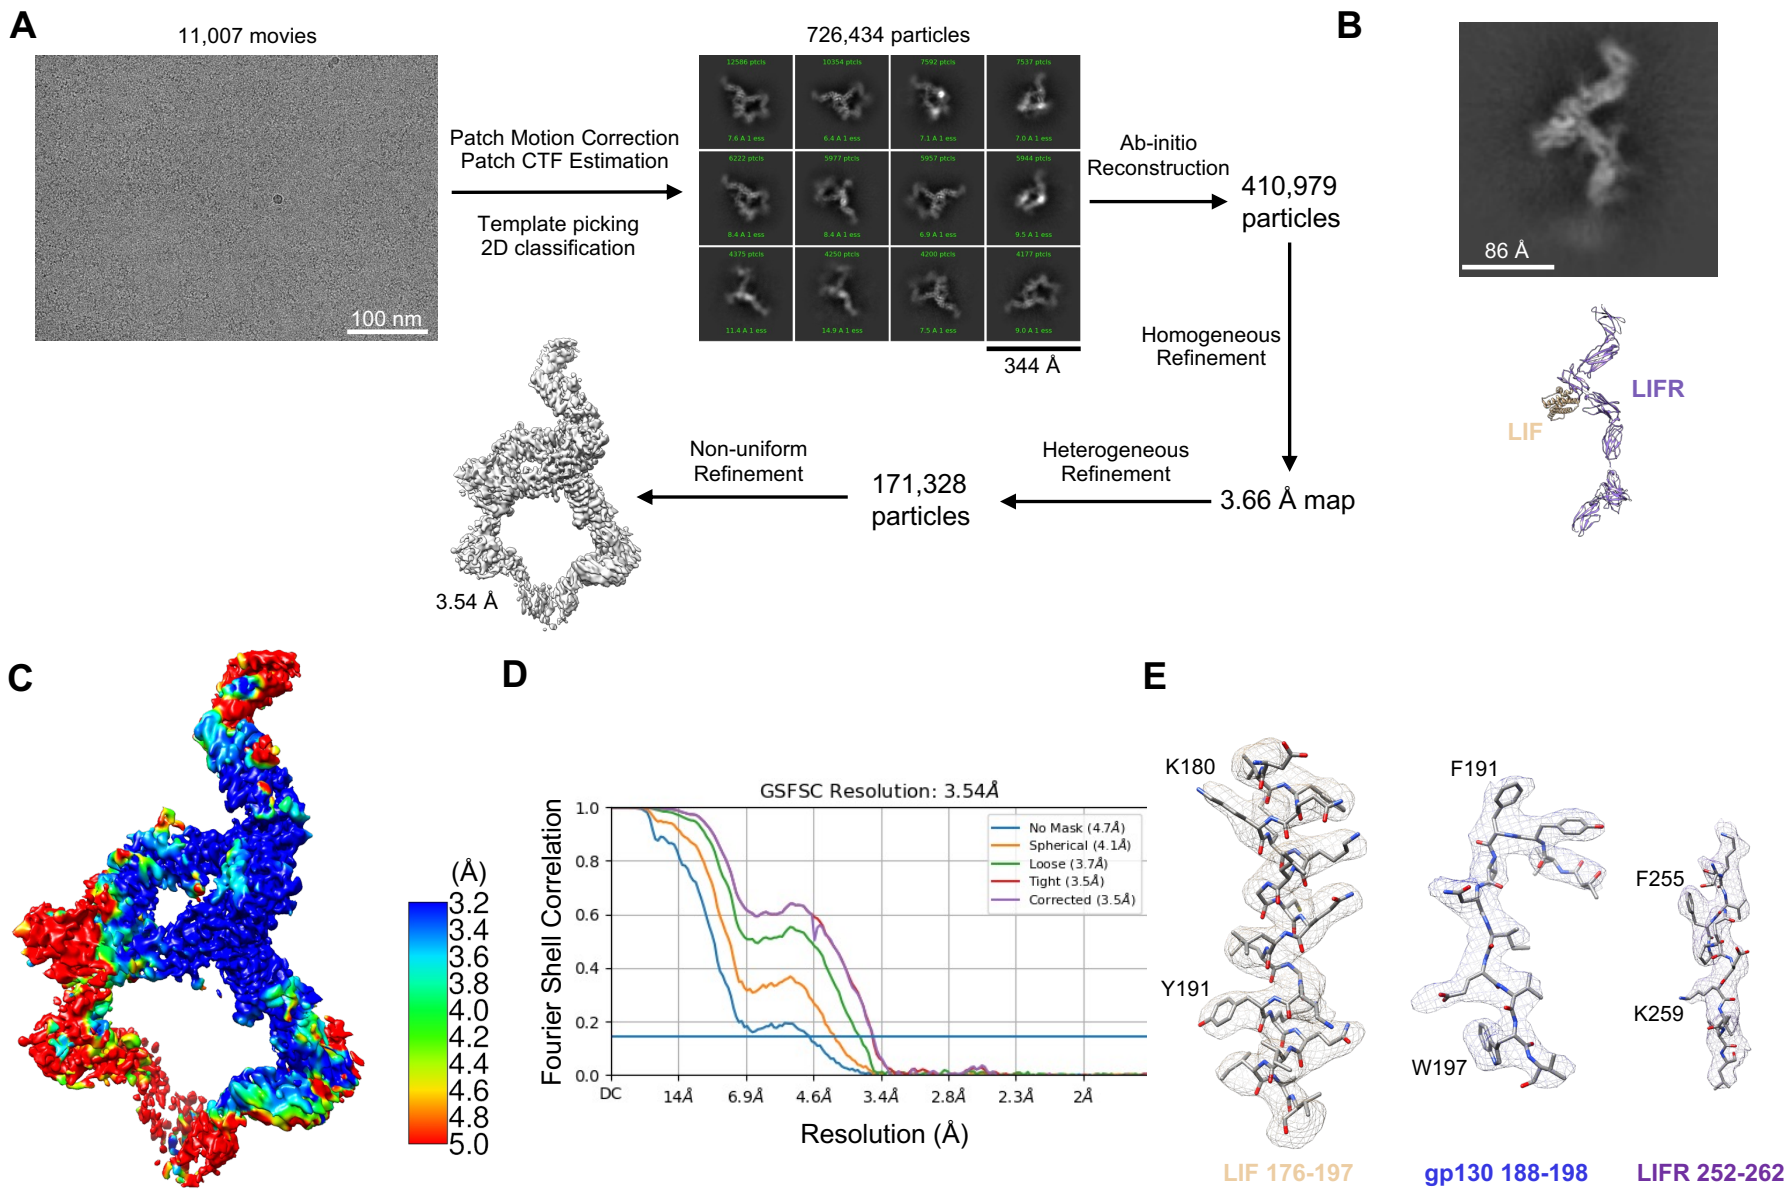

**Fig. S5. Cryo-EM analysis of the LIF signaling complex**

(A) Workflow for cryo-EM data processing.

(B) LIF complex intermediate (LIF/LIFR sub-complex) observed on the EM grid.

(C) Local resolution estimation of the final cryo-EM density map showing around 3.2 Å local resolution at the interaction core region, including LIF, gp130 D2-D5, and LIFR D2-D5.

(D) FSC curve of the LIF complex reconstruction showing a global resolution of 3.54 Å with the 0.143 gold standard threshold.

(E) Representative cryo-EM density of the 3D reconstruction in (C).



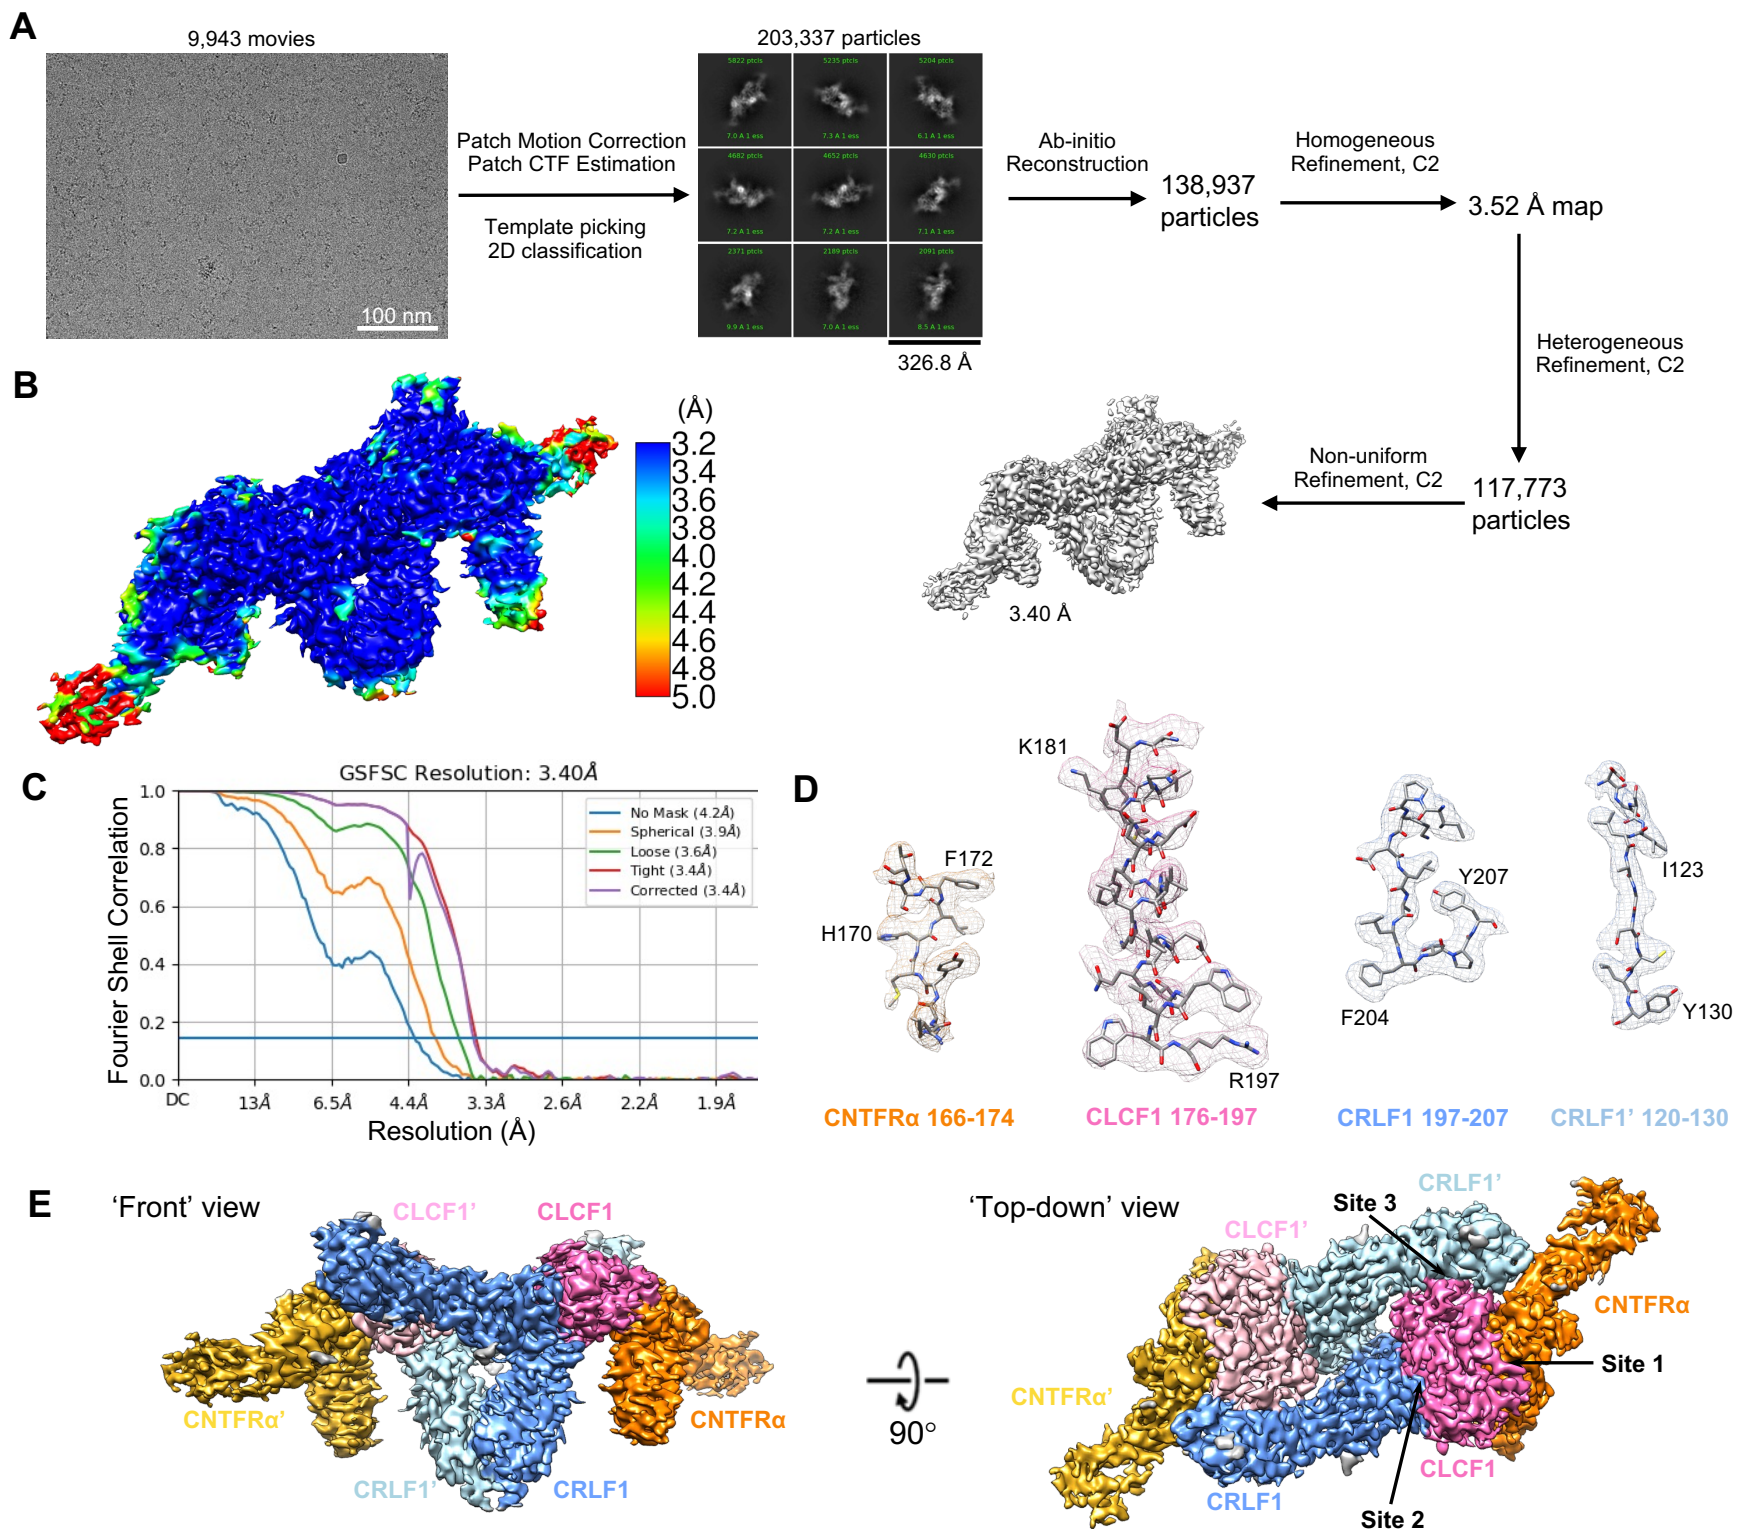

**Fig. S6. Cryo-EM analysis of the CRLF1-CLCF1-CNTFR $\alpha$  complex**

(A) Workflow for cryo-EM data processing.

(B) Local resolution estimation of the final cryo-EM density map of the CRLF1-CLCF1-CNTFR $\alpha$  complex.

(C) FSC curve of the CRLF1-CLCF1-CNTFR $\alpha$  complex reconstruction showing a global resolution of 3.40 Å with the 0.143 gold standard threshold.

(D) Representative cryo-EM density of the 3D reconstruction in (B).

(E) Colored density map of the CRLF1-CLCF1-CNTFR $\alpha$  complex in 'front' and 'top-down' views showing 2-fold symmetry of the complex. The two sets of molecules in the hexameric complex are annotated as CRLF1, CLCF1, CNTFR $\alpha$ , CRLF1', CLCF1', and CNTFR $\alpha$ '.



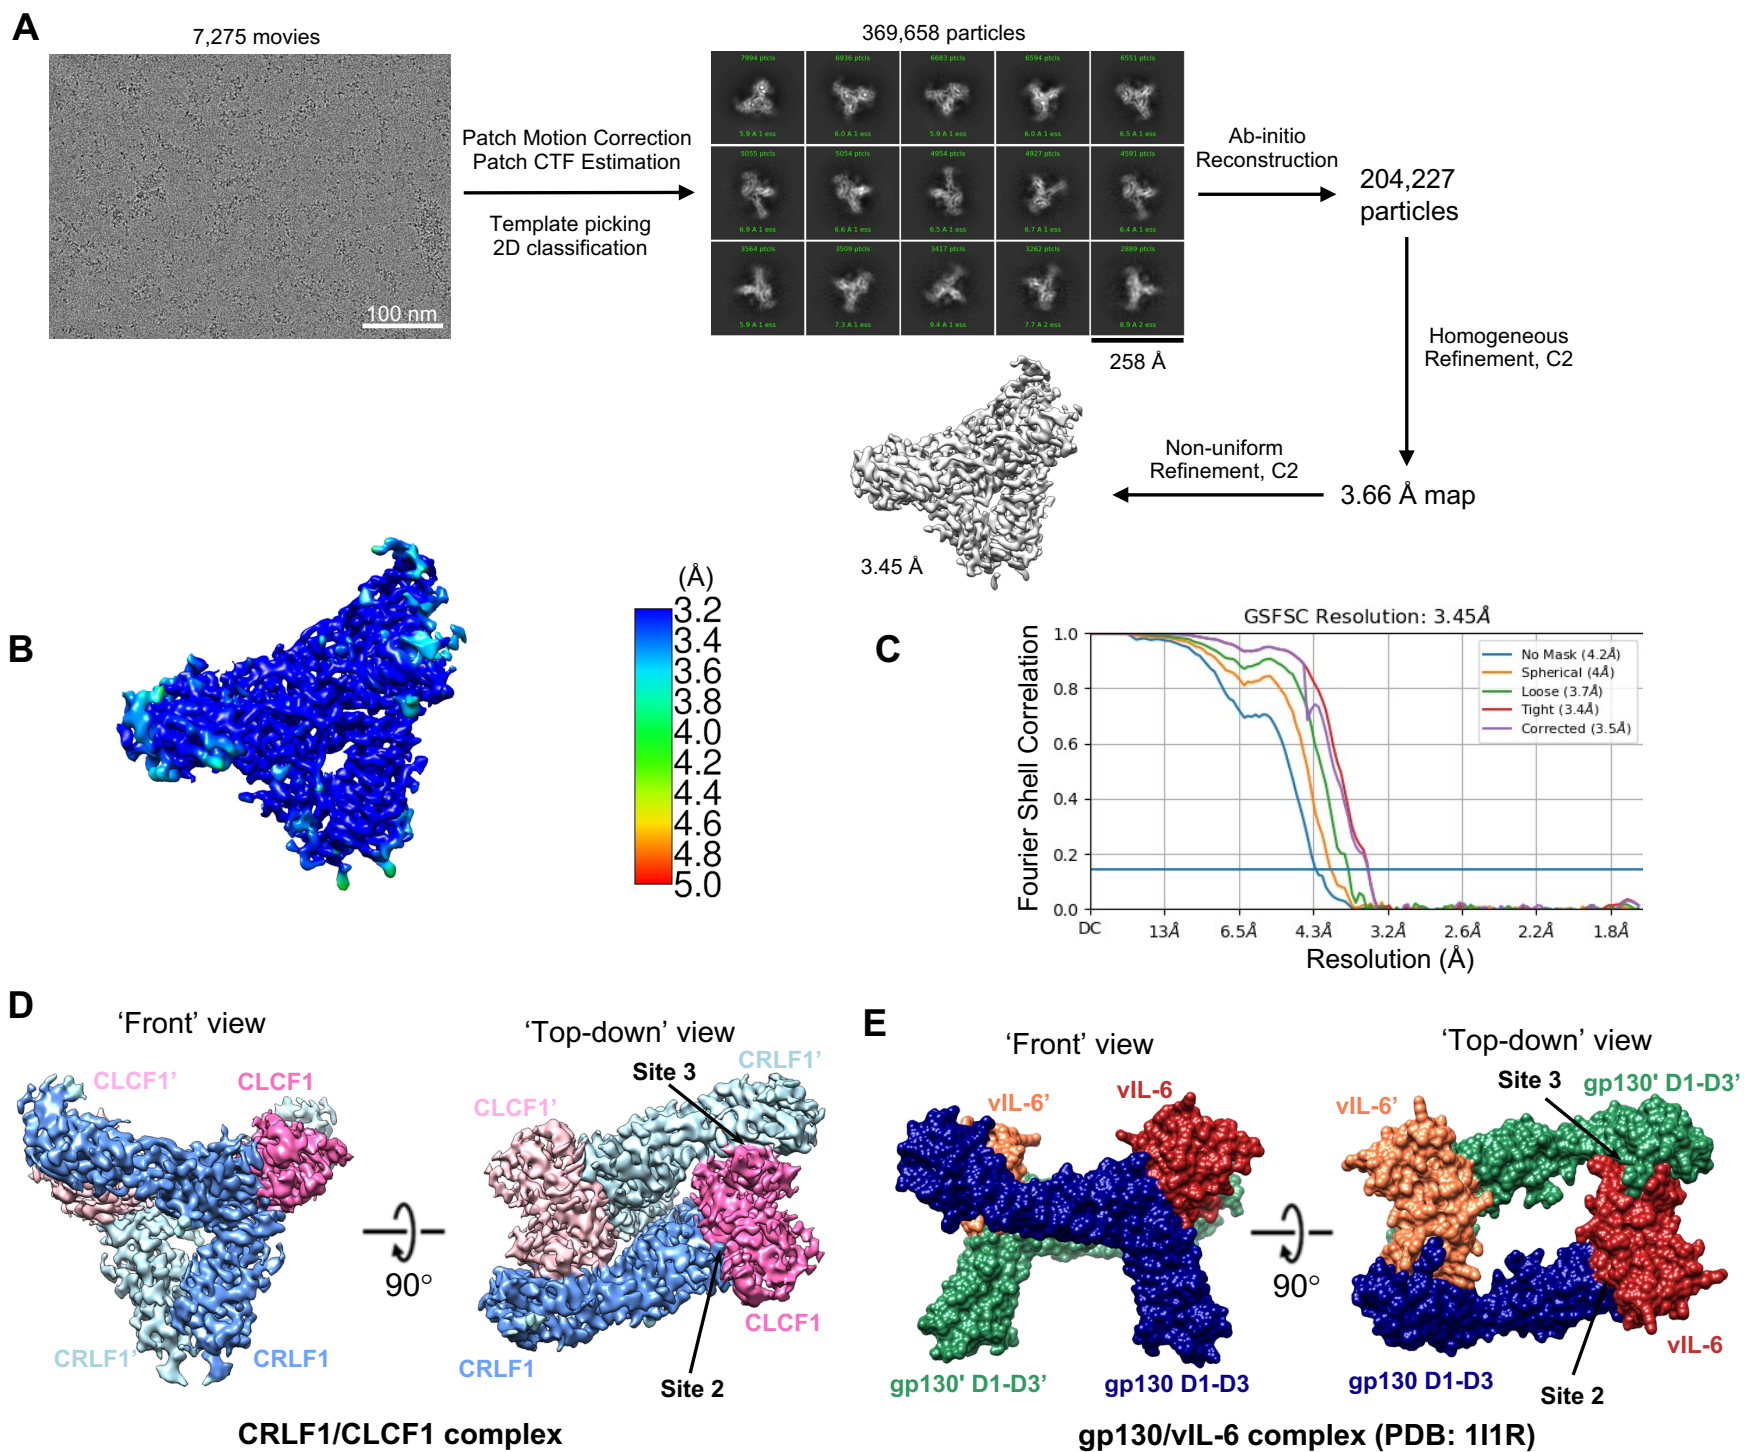

**Fig. S7. Cryo-EM analysis of the CRLF1-CLCF1 complex**

(A) Workflow for cryo-EM data processing.

(B) Local resolution estimation of the final cryo-EM density map of the CRLF1-CLCF1 complex .

(C) FSC curve of the CRLF1-CLCF1 complex reconstruction showing a global resolution of 3.45 Å with the 0.143 gold standard threshold.

(D) Colored density map of the CRLF1-CLCF1 complex in 'front' and 'top-town' views showing 2-fold symmetry of the complex. The two sets of molecules in the tetrameric complex are annotated as CRLF1, CLCF1, CRLF1', and CLCF1'.

(E) Surface representation of the gp130 D1-D3/vIL-6 complex crystal structure (PDB: 1I1R) in 'front' and 'top-town' views showing similar architectures of this complex and the CRLF1-CLCF1 complex.

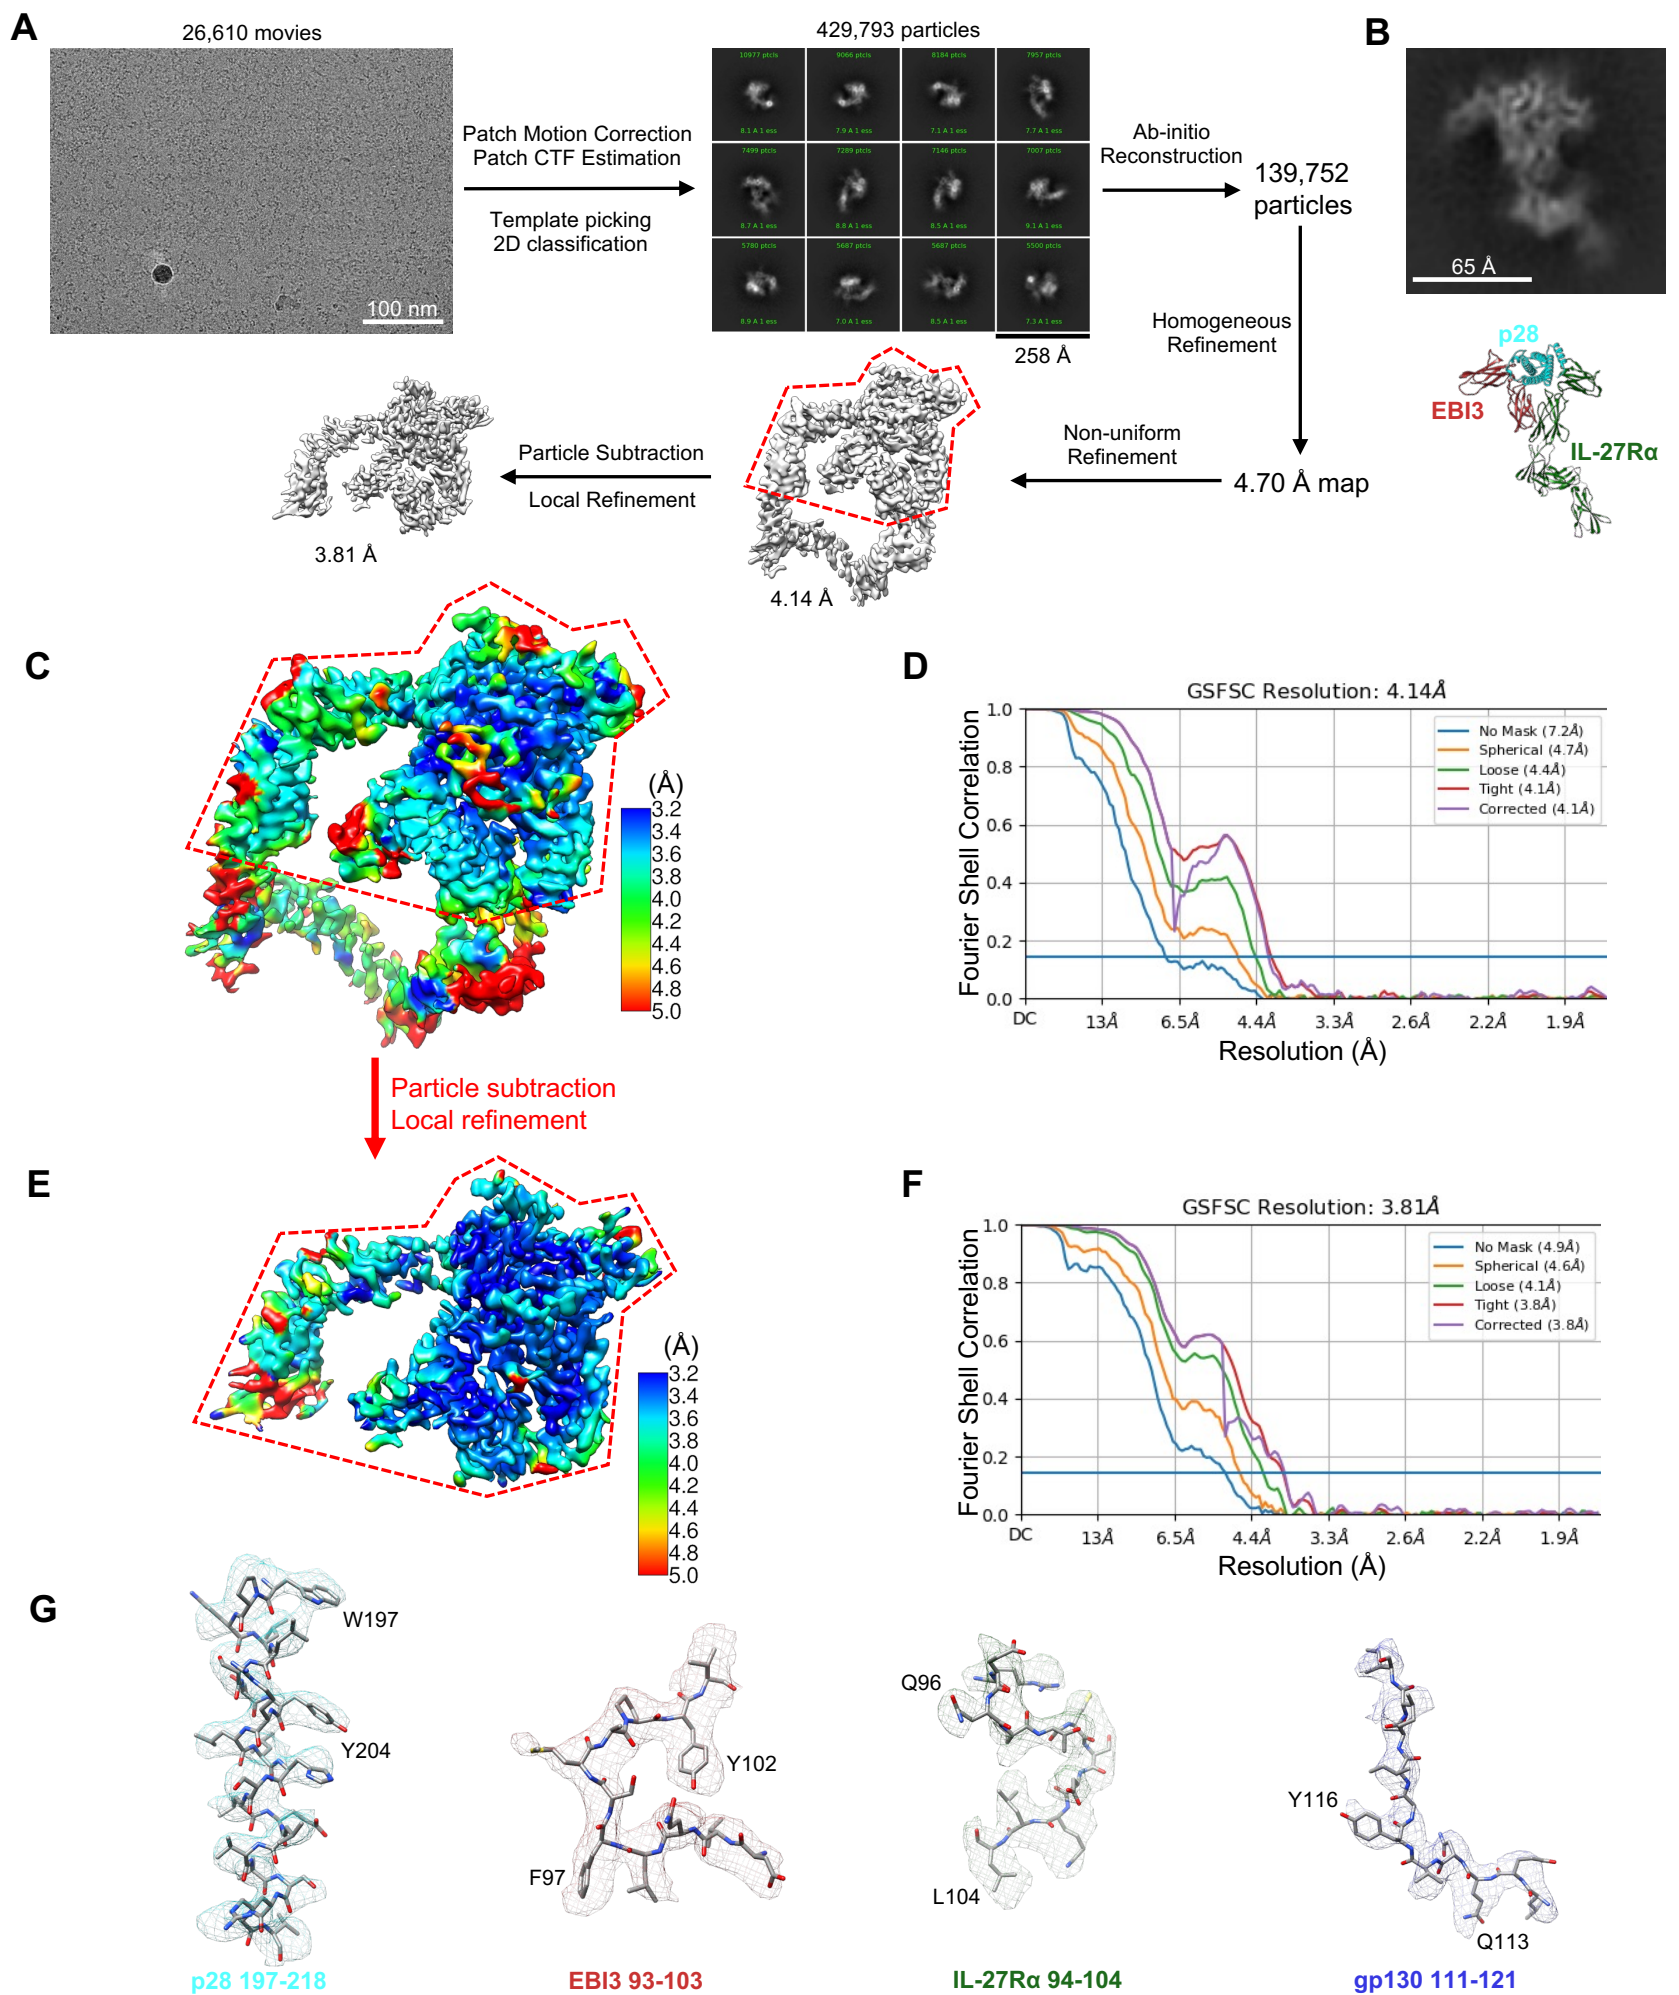

**Fig. S8. Cryo-EM analysis of the IL-27 signaling complex**

(A) Workflow for cryo-EM data processing.

(B) IL-27 complex intermediate (p28/EBI3/IL-27R $\alpha$  sub-complex) observed on the EM grid.

(C) Local resolution estimation of the final cryo-EM density map showing around 3.6 Å local resolution at the interaction core region. This map was used to build a complete model of the IL-27 signaling complex. Models of gp130 D4-D6 derived from PDB:3L5H and IL-27R $\alpha$  D3-D5 predicted by AlphaFold were rigid-body refined against the EM density. The map and model were used to show the overall architecture of the complex as shown in Figs. 4A-4C.

(D) FSC curve of the full IL-27 complex reconstruction showing a global resolution of 4.14 Å with the 0.143 gold standard threshold.

(E) Particles from (C) was subjected to particle subtraction and focused refinement around the interaction core region, including p28, EBI3, IL-27R $\alpha$  D1D2, and gp130 D1-D3. Local resolution estimation of the focused refinement map shows around 3.4 Å local resolution at the binding interfaces. This map was used to build the atomic model for the interaction core region. The model was used to analyze the interaction details as shown in Figs. 5A-5D.

(F) FSC curve of the focused refinement map showing a resolution of 3.81 Å with the 0.143 gold standard threshold.

(G) Representative cryo-EM density of the 3D reconstruction in (E).



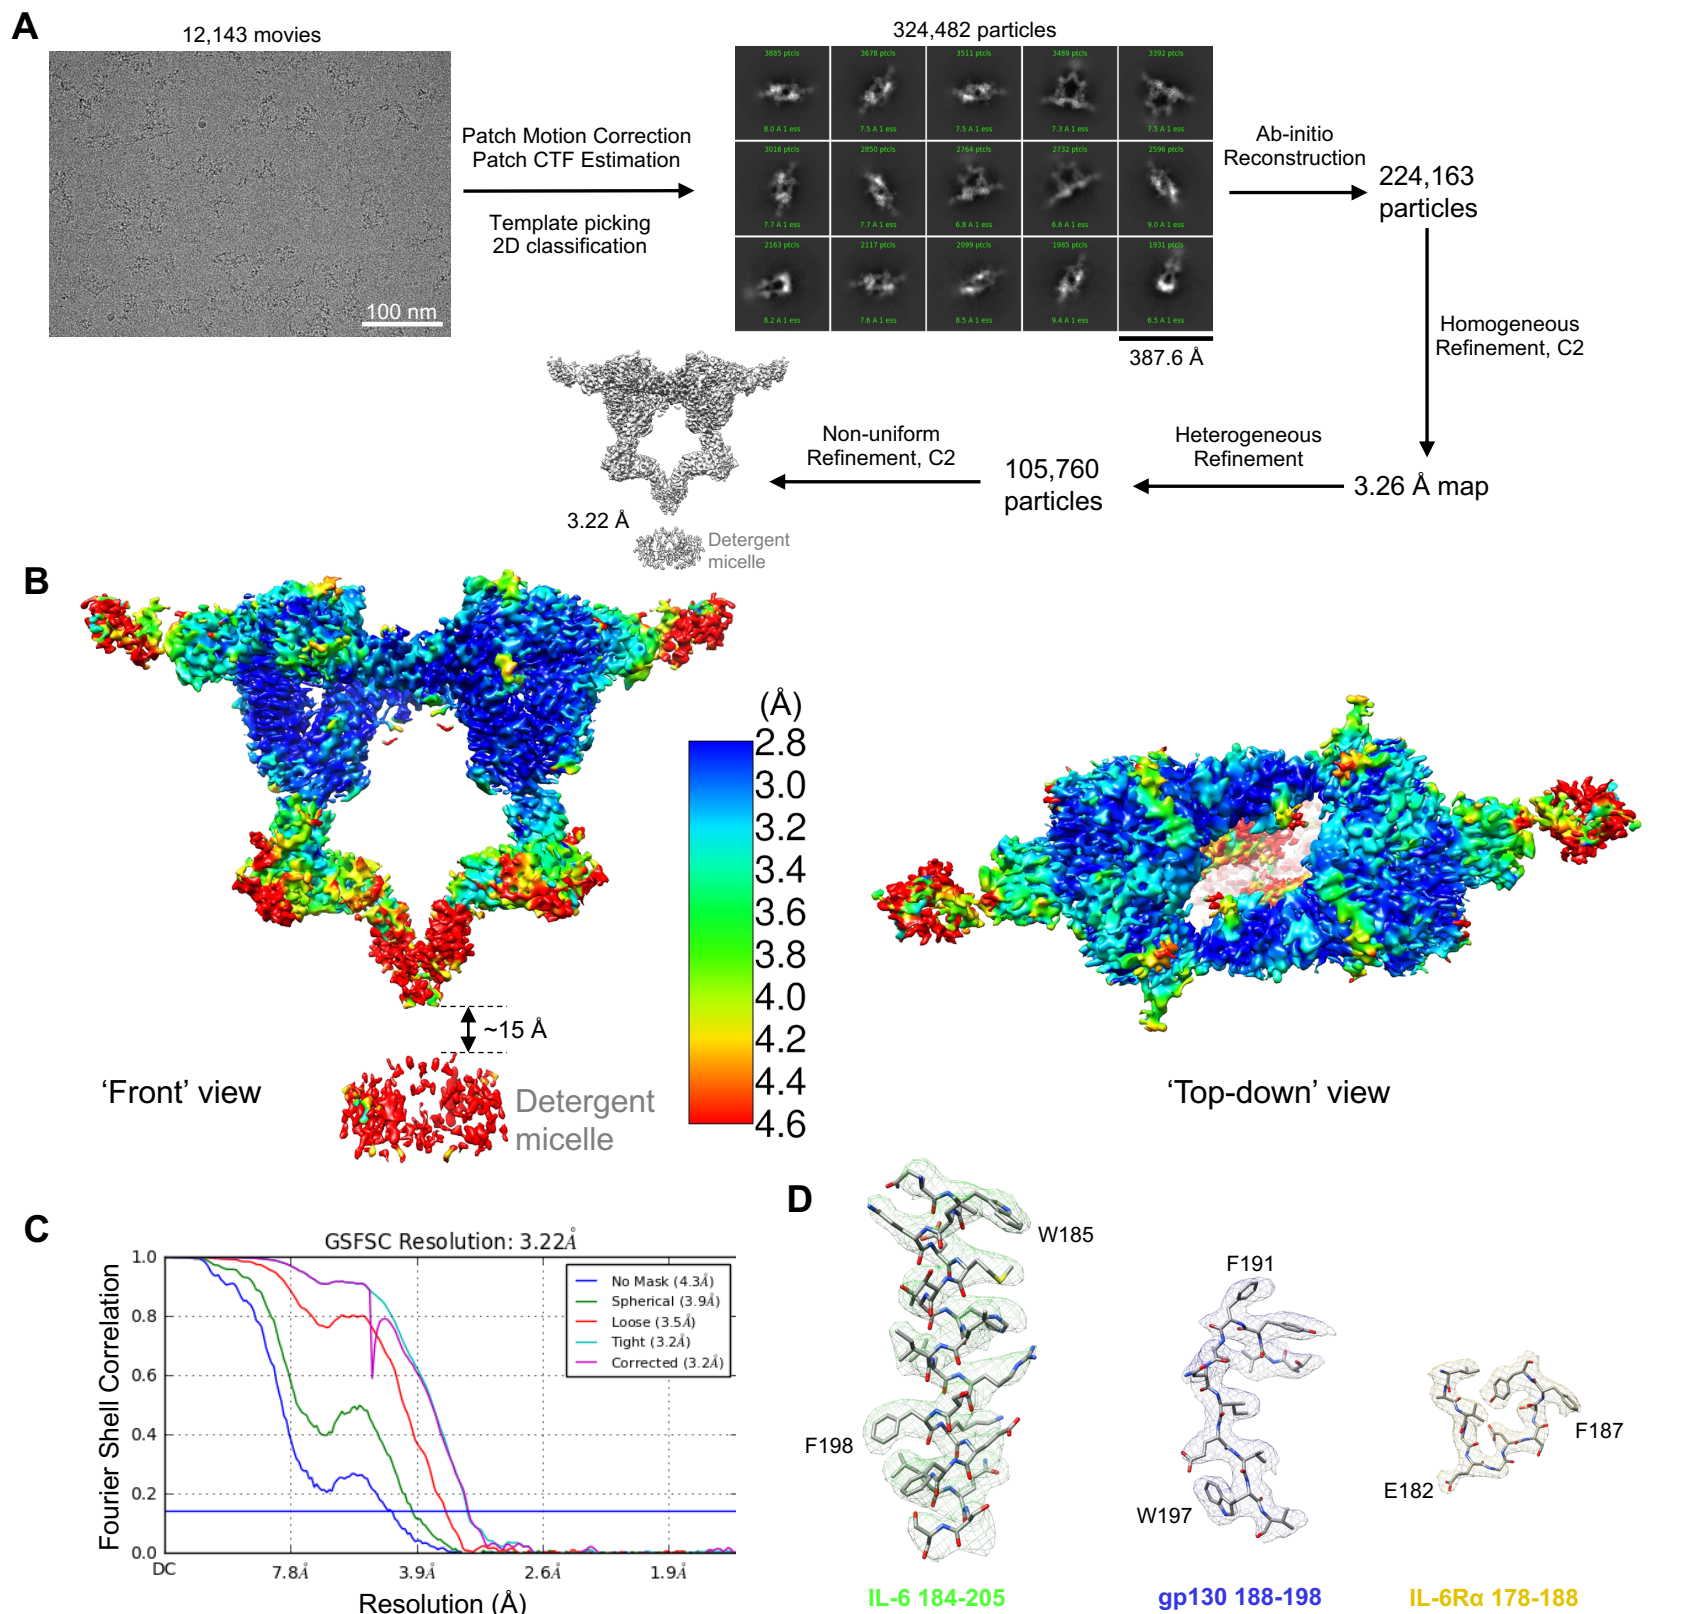

**Fig. S9. Cryo-EM analysis of the IL-6 signaling complex in detergent**

(A) Workflow for cryo-EM data processing.

(B) Local resolution estimation of the final cryo-EM density map in 'front' and 'top-down' views showing around 2.8 Å local resolution at the interaction core region and 2-fold symmetry of the complex. The TM domain of gp130 is not resolved in the detergent micelle due to flexibility. There is a ~15 Å gap between gp130 C-terminal density and the detergent micelle, which likely represents the flexible linker between gp130 D6 and TM region.

(C) FSC curve of the IL-6 complex reconstruction showing a global resolution of 3.22 Å with the 0.143 gold standard threshold.

(D) Representative cryo-EM density of the 3D reconstruction in (B).



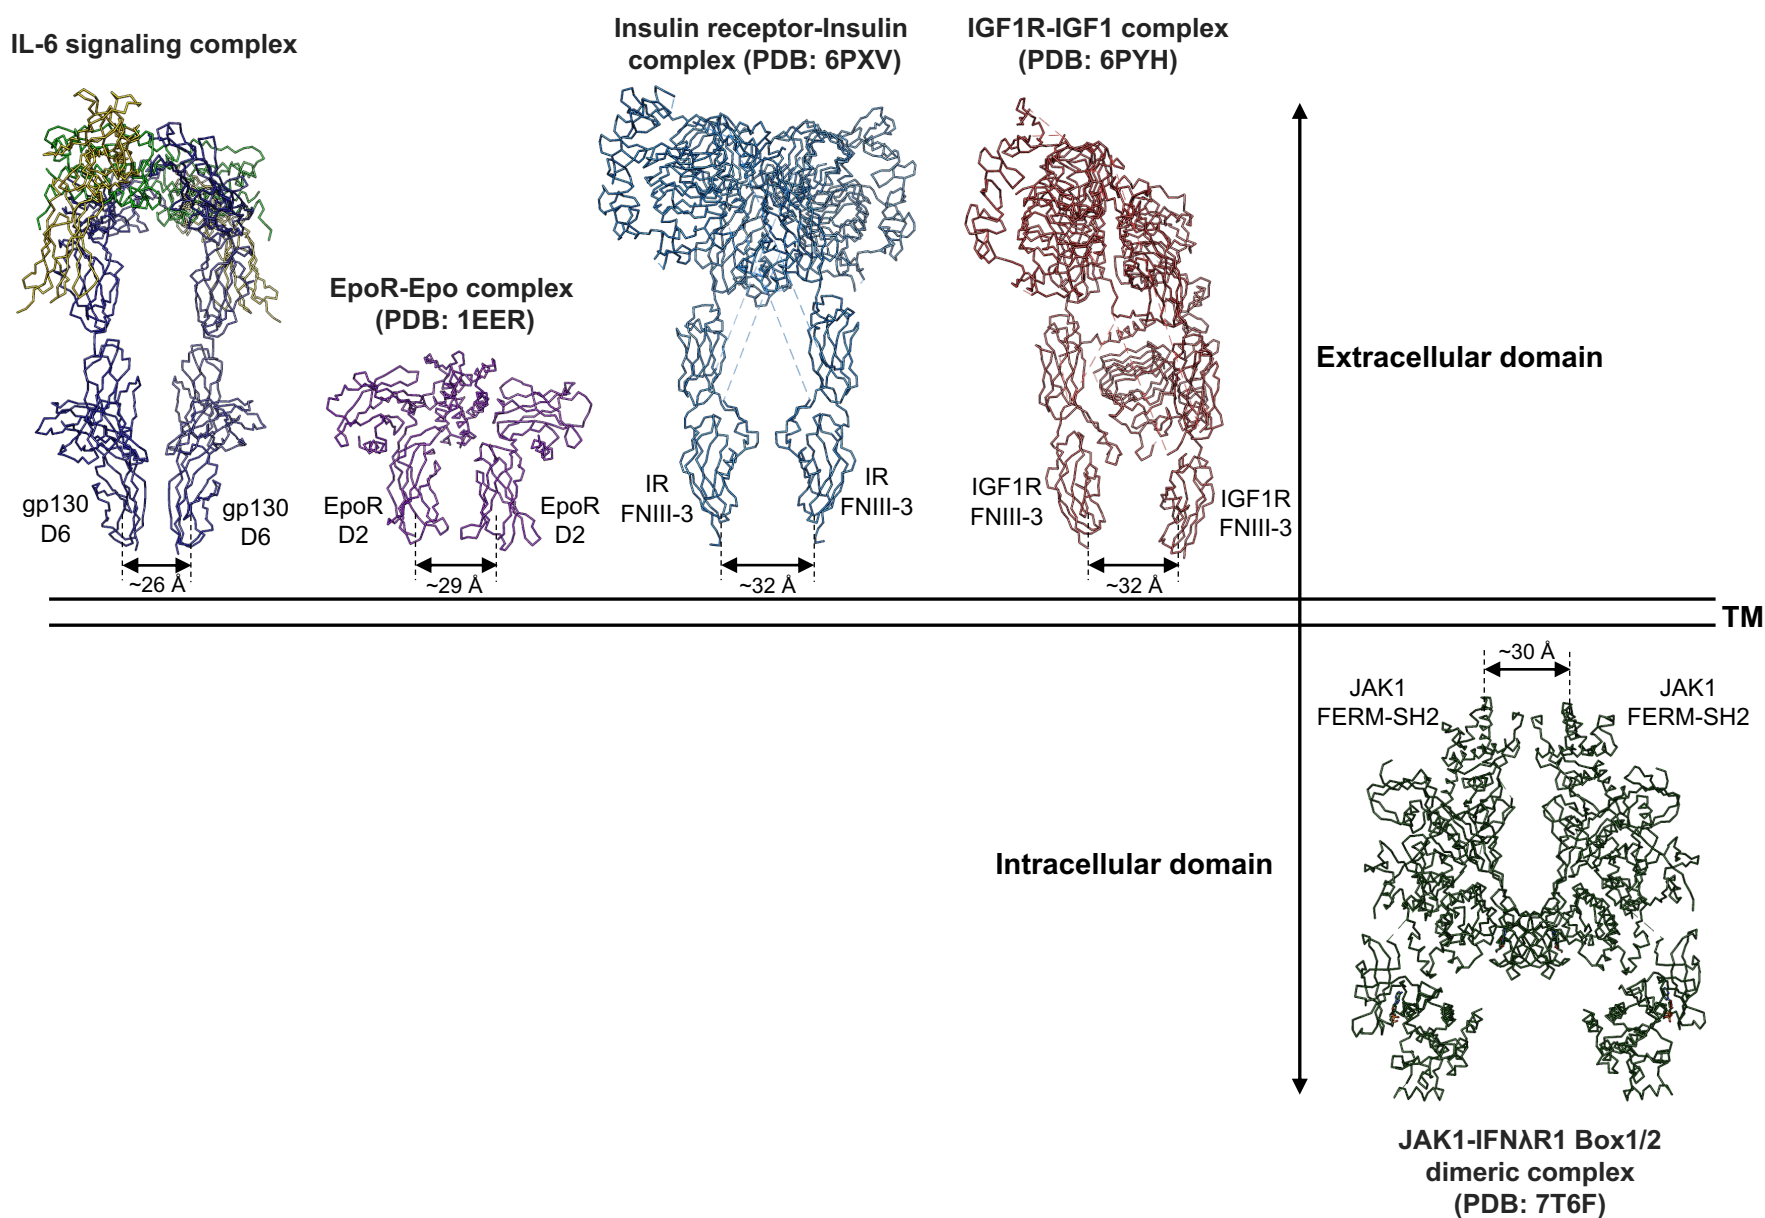

**Fig. S10. Comparison of distances between membrane-proximal domains in various cytokine signaling complexes and the intracellular JAK1-IFN $\lambda$ R1 dimeric complex**

The distances between the bottom centers of the membrane-proximal domains of the two signaling receptors in the IL-6 complex, EpoR-Epo complex (PDB: 1EER), Insulin receptor-insulin complex (PDB: 6PXV), IGF1R-IGF1 complex (PDB: 6PYH) are all around 30 Å. Moreover, on the intracellular side, the distance between the two membrane-proximal FERM-SH2 domains in the JAK1-IFN $\lambda$ R1 dimeric complex (PDB: 7T6F) is also about 30 Å.

**Table S1. Sequence identity scores (%) among seven gp130 family cytokines calculated using Gonnet similarity matrix in MacVector software**

|                  | <b>CNTF</b> | <b>CLCF1</b> | <b>LIF</b> | <b>IL-27 p28</b> | <b>IL-6</b> | <b>OSM</b> | <b>IL-11</b> |
|------------------|-------------|--------------|------------|------------------|-------------|------------|--------------|
| <b>CNTF</b>      | 100.0       | 15.7         | 11.5       | 14.9             | 8.4         | 9.5        | 8.9          |
| <b>CLCF1</b>     | 15.7        | 100.0        | 12.6       | 17.7             | 11.1        | 12.5       | 16.8         |
| <b>LIF</b>       | 11.5        | 12.6         | 100.0      | 6.0              | 12.1        | 8.7        | 11.3         |
| <b>IL-27 p28</b> | 14.9        | 17.7         | 6.0        | 100.0            | 14.1        | 9.5        | 19.8         |
| <b>IL-6</b>      | 8.4         | 11.1         | 12.1       | 14.1             | 100.0       | 10.0       | 14.7         |
| <b>OSM</b>       | 9.5         | 12.5         | 8.7        | 9.5              | 10.0        | 100.0      | 11.0         |
| <b>IL-11</b>     | 8.9         | 16.8         | 11.3       | 19.8             | 14.7        | 11.0       | 100.0        |

**Table S2. Cryo-EM data collection, processing, and refinement statistics**

|                                                     | <b>CNTF<br/>signaling<br/>complex</b>   | <b>CLCF1<br/>signaling<br/>complex</b> | <b>LIF<br/>signaling<br/>complex</b> | <b>IL-27<br/>signaling<br/>complex</b>  | <b>IL-6<br/>signaling<br/>complex</b> | <b>CRLF1-<br/>CLCF1-<br/>CNTFR<math>\alpha</math><br/>complex</b> | <b>CNTFR<math>\alpha</math>-<br/>REGN8938<br/>Fab-<br/>H4H25322P2<br/>Fab complex</b> |
|-----------------------------------------------------|-----------------------------------------|----------------------------------------|--------------------------------------|-----------------------------------------|---------------------------------------|-------------------------------------------------------------------|---------------------------------------------------------------------------------------|
| <b>Data collection and processing</b>               |                                         |                                        |                                      |                                         |                                       |                                                                   |                                                                                       |
| Magnification                                       | 105,000                                 | 105,000                                | 105,000                              | 105,000                                 | 105,000                               | 105,000                                                           | 105,000                                                                               |
| Voltage (kV)                                        | 300                                     | 300                                    | 300                                  | 300                                     | 300                                   | 300                                                               | 300                                                                                   |
| Electron exposure (e <sup>-</sup> /Å <sup>2</sup> ) | 40                                      | 40                                     | 40                                   | 40                                      | 40                                    | 40                                                                | 40                                                                                    |
| Defocus range (μm)                                  | -1.4 to -2.6                            | -1.4 to -2.6                           | -1.4 to -2.6                         | -1.4 to -2.6                            | -1.4 to -2.6                          | -1.4 to -2.6                                                      | -1.4 to -2.6                                                                          |
| Pixel size (Å)                                      | 0.85                                    | 0.86                                   | 0.86                                 | 0.86                                    | 0.85                                  | 0.86                                                              | 0.85                                                                                  |
| Number of movies                                    | 6,511                                   | 25,442                                 | 11,007                               | 26,610                                  | 12,143                                | 9,943                                                             | 7,859                                                                                 |
| Initial number of particles                         | 3,197,974                               | 13,119,612                             | 5,545,456                            | 19,480,836                              | 3,881,621                             | 1,258,062                                                         | 4,515,671                                                                             |
| Final selected particles                            | 250,735   100,013                       | 92,463                                 | 171,328                              | 139,752                                 | 105,760                               | 117,773                                                           | 568,328                                                                               |
| Symmetry imposed                                    | C1                                      | C1                                     | C1                                   | C1                                      | C2                                    | C2                                                                | C1                                                                                    |
| Map resolution (Å)                                  | 3.03   3.37                             | 3.90                                   | 3.54                                 | 3.81   4.14                             | 3.22                                  | 3.40                                                              | 2.93                                                                                  |
| FSC threshold                                       | 0.143                                   | 0.143                                  | 0.143                                | 0.143                                   | 0.143                                 | 0.143                                                             | 0.143                                                                                 |
| <b>Refinement</b>                                   |                                         |                                        |                                      |                                         |                                       |                                                                   |                                                                                       |
| Map sharpening <i>B</i> factor (Å <sup>2</sup> )    | -70   -49.6                             | -90                                    | -51.4                                | -120   -90                              | -78                                   | -94.5                                                             | -99.6                                                                                 |
| Model composition                                   |                                         |                                        |                                      |                                         |                                       |                                                                   |                                                                                       |
| Non-hydrogen atoms                                  | 9,640   -                               | 9,628                                  | 7,912                                | 7,101   -                               | 17,366                                | 12,542                                                            | 8,960                                                                                 |
| Protein residues                                    | 1,163   -                               | 1,167                                  | 963                                  | 865   -                                 | 2,108                                 | 1,526                                                             | 1,143                                                                                 |
| Ligands                                             | 18   -                                  | 16                                     | 15                                   | 11   -                                  | 38                                    | 32                                                                | 8                                                                                     |
| R.m.s. deviations                                   |                                         |                                        |                                      |                                         |                                       |                                                                   |                                                                                       |
| Bond lengths (Å)                                    | 0.002   -                               | 0.002                                  | 0.002                                | 0.002   -                               | 0.002                                 | 0.002                                                             | 0.002                                                                                 |
| Bond angles (°)                                     | 0.448   -                               | 0.486                                  | 0.507                                | 0.471   -                               | 0.454                                 | 0.449                                                             | 0.447                                                                                 |
| Model vs. map                                       |                                         |                                        |                                      |                                         |                                       |                                                                   |                                                                                       |
| CC (volume)                                         | 0.76   -                                | 0.54                                   | 0.71                                 | 0.63   -                                | 0.75                                  | 0.73                                                              | 0.75                                                                                  |
| CC (mask)                                           | 0.79   -                                | 0.56                                   | 0.73                                 | 0.65   -                                | 0.76                                  | 0.76                                                              | 0.78                                                                                  |
| Mean Protein <i>B</i> factor (Å <sup>2</sup> )      | 81.75   -                               | 55.58                                  | 87.06                                | 60.19   -                               | 85.93                                 | 85.34                                                             | 28.43                                                                                 |
| Validation                                          |                                         |                                        |                                      |                                         |                                       |                                                                   |                                                                                       |
| MolProbity score                                    | 1.66   -                                | 1.79                                   | 1.85                                 | 1.55   -                                | 1.43                                  | 1.34                                                              | 1.53                                                                                  |
| Rotameric outliers (%)                              | 0.85   -                                | 0.00                                   | 0.00                                 | 0.00   -                                | 0.95                                  | 1.06                                                              | 1.30                                                                                  |
| Clash score                                         | 5.34   -                                | 5.56                                   | 6.62                                 | 4.91   -                                | 3.18                                  | 2.71                                                              | 5.45                                                                                  |
| Ramachandran plot                                   |                                         |                                        |                                      |                                         |                                       |                                                                   |                                                                                       |
| Favored (%)                                         | 94.54   -                               | 91.88                                  | 91.95                                | 95.79   -                               | 95.37                                 | 96.10                                                             | 97.17                                                                                 |
| Allowed (%)                                         | 5.46   -                                | 8.12                                   | 8.05                                 | 4.09   -                                | 4.63                                  | 3.90                                                              | 2.83                                                                                  |
| Disallowed (%)                                      | 0.00   -                                | 0.00                                   | 0.00                                 | 0.12   -                                | 0.00                                  | 0.00                                                              | 0.00                                                                                  |
| <b>Deposition ID</b>                                |                                         |                                        |                                      |                                         |                                       |                                                                   |                                                                                       |
| PDB                                                 | 8D74   -                                | 8D7R                                   | 8D6A                                 | 8D85   -                                | 8D82                                  | 8D7H                                                              | 8D7E                                                                                  |
| EMDB                                                | 27227 <sup>a</sup>   27229 <sup>b</sup> | 27231                                  | 27221                                | 27247 <sup>c</sup>   27246 <sup>d</sup> | 27244                                 | 27230                                                             | 27228                                                                                 |

<sup>a</sup> Cryo-EM map of the CNTF signaling complex: refined from the selected full particle dataset, with better resolution in the interaction core region

<sup>b</sup> Cryo-EM map of the CNTF signaling complex: refined from a particle subset, with lower global resolution but improved LIFR D6-D8 density

<sup>c</sup> Cryo-EM map of the IL-27 signaling complex: focused refinement on the interaction core region

<sup>d</sup> Cryo-EM map of the IL-27 signaling complex with full ECDs
